# Supplementary material for: Electrooxidation of rhodamine B hydrazide
Source: Royal Society of Chemistry journal article supplement (doi:10.1039/d3nj02914j), 2023-01-01
Supplement: d3nj02914j1.pdf [file d3nj02914j1.pdf]

## *Supporting Information for*

# “Electrooxidation of rhodamine B hydrazide”

Nikita Belko,<sup>\*a</sup> Hanna Malanova,<sup>b</sup> Anatol Lugovski,<sup>a</sup> Sviatlana Fatykhava,<sup>c</sup> Polina Shabunya,<sup>c</sup> Anastasiya Tabolich,<sup>d</sup> Michael Samtsova,<sup>e</sup> and Sergey Poznyak<sup>b</sup>

<sup>a</sup> A.N. Sevchenko Institute of Applied Physical Problems, Belarusian State University, Kurchatova str. 7, 220045 Minsk, Belarus.

<sup>b</sup> Research Institute for Physical Chemical Problems, Belarusian State University, Leningradskaya str. 14, 220006 Minsk, Belarus.

<sup>c</sup> Institute of Bioorganic Chemistry, NAS of Belarus, Akademika Kuprevicha str. 5-2, 220141 Minsk, Belarus.

<sup>d</sup> B.I. Stepanov Institute of Physics, NAS of Belarus, Nezavisimosty ave. 68, 220072 Minsk, Belarus.

<sup>e</sup> Faculty of Physics, Belarusian State University, Bobruiskaya str. 5, 220006 Minsk, Belarus.

\*E-mail: belkonv@bsu.by

The Supporting Information contains additional LC/MS data. Figure S1 shows the mass spectrum for as-synthesized rhodamine B hydrazide (RBH). Figure S2 presents the chromatogram obtained after the electrooxidation of RBH. Figures S3–S5 demonstrate the absorption and mass spectra for the electrooxidation products of RBH: rhodamine B (compound **1**), a phenanthrenone derivative (compound **2**), and a phtalazinone derivative (compound **3**).

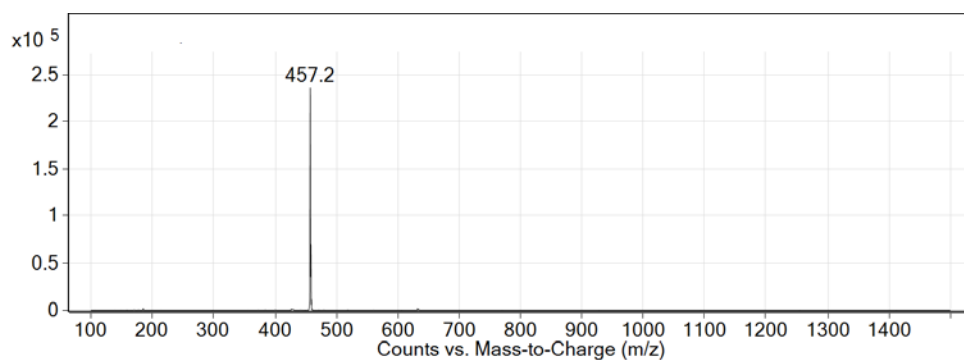

**Figure S1.** Mass spectrum for as-synthesized RBH.

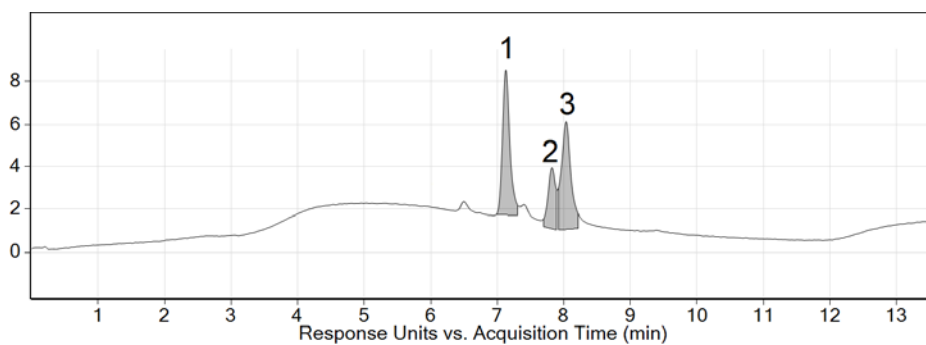

**Figure S2.** Chromatogram for a 0.2 mM solution of RBH in the supporting electrolyte (0.1 M LiClO<sub>4</sub> in acetonitrile) after electrolysis at 0.9 V (vs. SCE) for 60 min. The chromatogram was recorded at 510 nm.

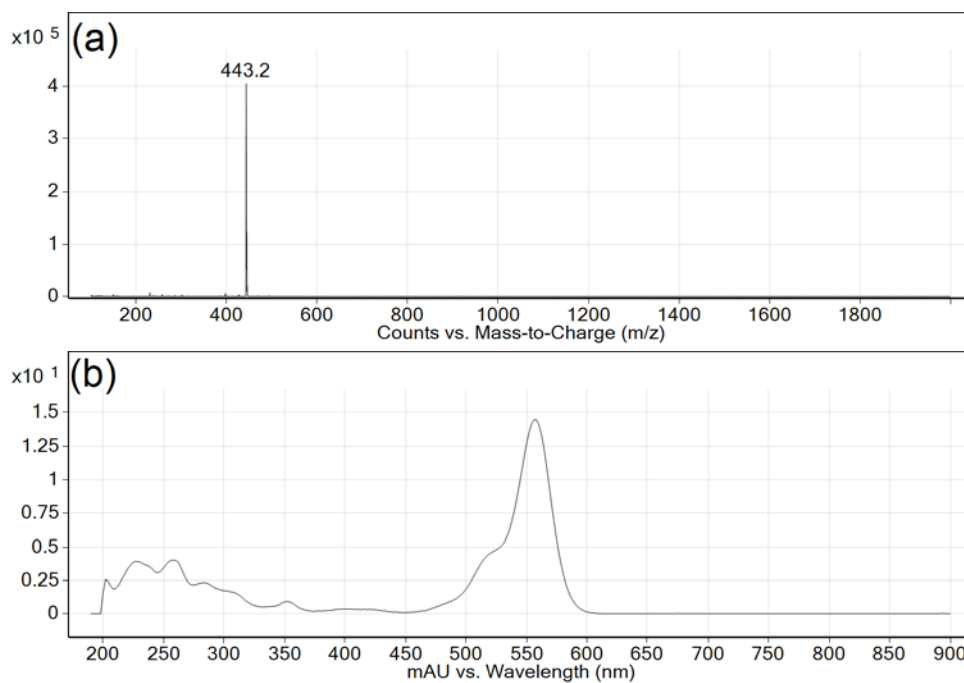

**Figure S3.** Mass spectrum (a) and UV-Vis absorption spectrum (b) for peak 1 in the chromatogram of Figure S3. This peak is assigned to compound 1 (rhodamine B).

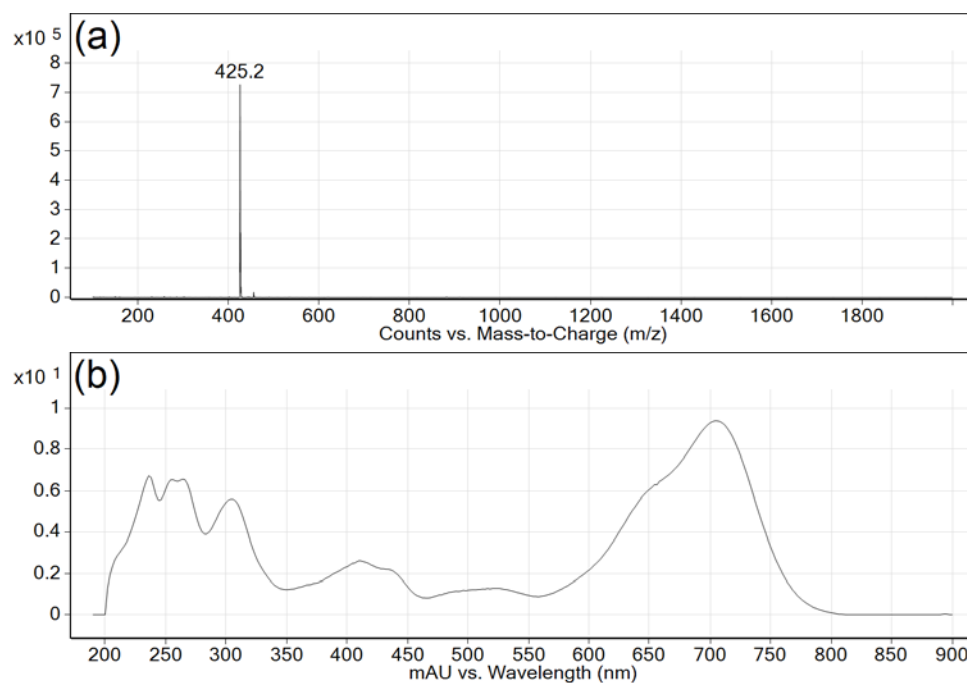

**Figure S4.** Mass spectrum (a) and UV-Vis absorption spectrum (b) for peak **2** in the chromatogram of Figure S3. This peak is assigned to compound **2** (a phenanthrenone derivative).

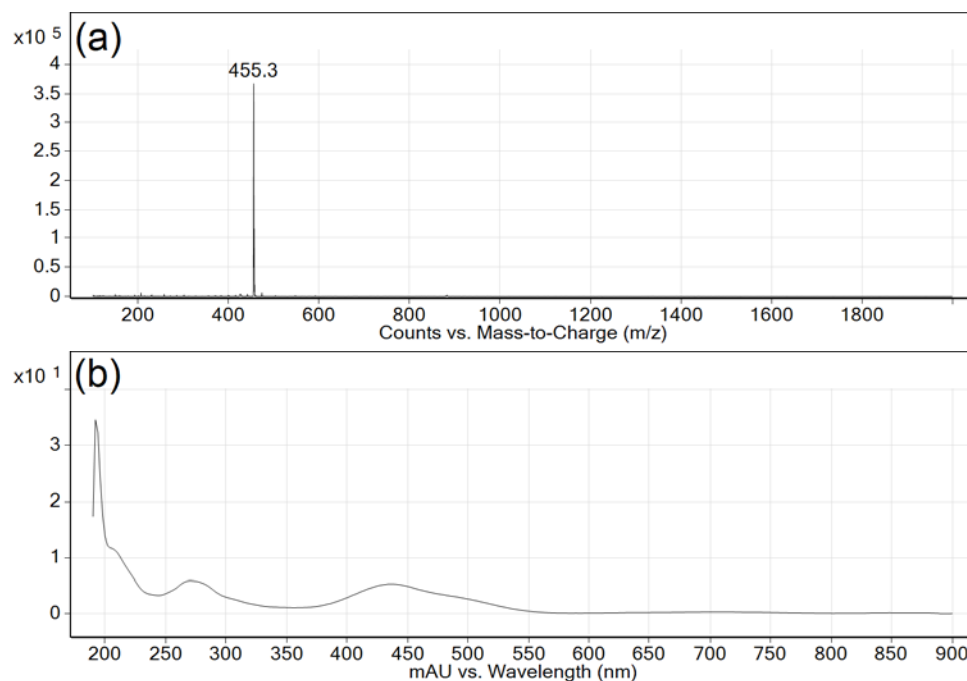

**Figure S5.** Mass spectrum (a) and UV-Vis absorption spectrum (b) for peak **3** in the chromatogram of Figure S3. This peak is assigned to compound **3** (a phthalazinone derivative).
